# Supplementary material
Source: PubMed Central journal article supplement (PMC3030183)
Supplement: mmc1.pdf [file mmc1.pdf]

Supplementary Material:  
Accounting for protein-solvent contacts facilitates  
design of non-aggregating lattice proteins

Sanne Abeln\*

Bioinformatics section, Department of Computer Science,  
VU University, Amsterdam, Netherlands

Daan Frenkel

Department of Chemistry,  
University of Cambridge, UK

November 15, 2010

---

\*Corresponding author. Address: Bioinformatics section, Department of Computer Science, VU University, Amsterdam, Netherlands De Boelelaan 1081A 1081 HV Amsterdam Netherlands Tel.: +31 20 59 87816 Fax: +31 20 59 87653

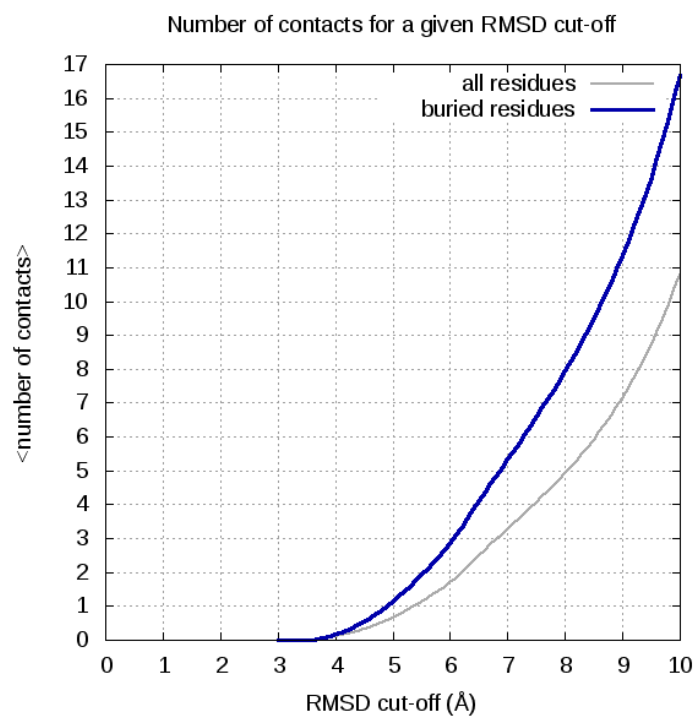

Figure 1: Coordination number of residues in protein structures  
 The distance cut-off between C-beta atoms versus the number of contacts within the distance cut-off. Buried residues are those with a solvent accessibility < 70% (Hubbard et. al. 1987).
